# Supplementary material for: Protein Intake and Mortality in Older Adults With Chronic Kidney Disease
Source: PubMed Central journal article supplement (PMC11307132; doi:10.1001/jamanetworkopen.2024.26577), 2024-08-07
Supplement: jamanetwopen-e2426577-s001.pdf [file jamanetwopen-e2426577-s001.pdf]

## Supplementary Online Content

Carballo-Casla A, Avesani CM, Beridze G, et al. Protein intake and mortality in older adults with chronic kidney disease. *JAMA Netw Open*. 2024;7(8):e2426577.  
doi:10.1001/jamanetworkopen.2024.26577

**eMethods 1.** Potential Confounders

**eMethods 2.** Multiple Imputation by Chained Equations

**eMethods 3.** Sensitivity Analyses

**eTable 1.** Participant Observations With Missing Data for Each Variable, Collection Wave, and Cohort

**eTable 2.** Characteristics of the Participant Observations, Stratified by Chronic Kidney Disease and Age

**eTable 3.** Characteristics of the Participant Observations, Stratified by Chronic Kidney Disease and Cohort

**eTable 4.** Hazard Ratios (95% CIs) of the Associations of the Main Sources of Animal and Plant Protein Intake With 10-Year All-Cause Mortality, Stratified by Chronic Kidney Disease

**eTable 5.** Hazard Ratios (95% CIs) of the Associations of Changes in Total, Animal, and Plant Protein Intake With 10-Year All-Cause Mortality, Stratified by Chronic Kidney Disease

**eTable 6.** Sensitivity Analyses: Hazard Ratios (95% CIs) of the Associations of Total, Animal, and Plant Protein Intake With 10-Year All-Cause Mortality, Stratified by Chronic Kidney Disease

**eFigure 1.** Participants' Flowchart, Stratified by Cohort

**eFigure 2.** Association of Total Protein Intake With 10-Year All-Cause Mortality, Stratified by Chronic Kidney Disease and Cohort

**eFigure 3.** Association of Total Protein Intake With 10-Year All-Cause Mortality, Stratified by Chronic Kidney Disease and Sex

**eFigure 4.** Association of the Proportion of Plant Protein With 10-Year All-Cause Mortality, Stratified by Chronic Kidney Disease and Age

**eReferences.**

This supplementary material has been provided by the authors to give readers additional information about their work.

## **eMethods 1. Potential Confounders**

Sociodemographic and lifestyle variables were generally self-reported, although physical activity was also estimated with accelerometers in Seniors-ENRICA 2. Weight and height were measured in standardized conditions, and self-reported data were used when they were not. Nutrient intakes were estimated from dietary histories and food frequency questionnaires (FFQs).<sup>2-5</sup>

In SNAC-K, information on morbidities was based on clinical examinations, blood tests, medications, patient histories, and inpatient and outpatient medical records.<sup>1</sup> In Seniors-ENRICA 1, medical diagnoses were self-reported save for diabetes and depression and mood disorders, where data on blood glucose levels and medications were also used. Operationalization of morbidities was similar in Seniors-ENRICA 2, except that primary care records were available for consultation.

## **eMethods 2.** Multiple Imputation by Chained Equations

Prior to the estimation of energy and nutrient intakes, missing FFQ items were imputed in SNAC-K participants who completed  $\geq 50\%$  of the questions (note that Seniors-ENRICA's dietary histories always provide complete records).<sup>6</sup>

Missing data on estimated glomerular filtration rates (eGFR) and potential confounders were imputed in all cohorts, as were energy and nutrient intakes in probable dietary misreporters ( $\leq 800$  or  $\geq 5000$  kilocalories/day in men and  $\leq 500$  or  $\geq 4000$  kilocalories/day in women). Continuous variables were imputed using predictive mean matching, and categorical variables using ordered logistic, multinomial logistic, or logistic regression, as appropriate. Nonmissing potential confounders were entered in the equations to improve predictions.

Our analyses used missing at random assumptions: we ran estimation commands in the imputed data and adjusted coefficients and standard errors for the variability between the 10 imputations according to the combination rules by Rubin.<sup>7</sup>

### **eMethods 3. Sensitivity Analyses**

Since data on diet and many potential confounders were self-reported, we excluded the participants with probable cognitive impairment (Mini-Mental State Examination score <24 points) at baseline and stopped updating information on all study variables when such condition presented in the follow-up waves.

Given that the participants with incident chronic kidney disease (CKD) contributed to both the CKD and no CKD risk sets, we restarted the cumulative average of dietary variables and continuous potential confounders at the follow-up wave in which CKD was ascertained.

To minimize the potential for reverse causation (i.e., health status leading to lower protein intake), we omitted the first year of follow-up, expressed protein intake in relative as opposed to absolute terms (percentage of energy intake) and in g/kg of ideal body weight/day (the weight at which body mass index equals 23 kg/m<sup>2</sup>), and excluded the observations carrying a medical diagnosis of CKD.

In addition, we excluded the participants who changed their total protein intake  $\geq 50\%$  between the first two food records and excluded the current and remaining observations when such change occurred later in the follow-up.

We alternately adjusted the analyses for the frailty phenotype (unintentional weight loss, exhaustion, weakness, slow walking speed, and low physical activity)<sup>8</sup> and hypertension (systolic blood pressure  $\geq 140$  millimeters of mercury, diastolic blood pressure  $\geq 90$  millimeters of mercury, use of antihypertensive medication, or medical diagnosis) to reduce residual confounding.

Since information on study variables could not be updated at every wave and cohort, we ran the analyses using baseline data only, with and without coarsened exact matching (a method for improving the estimation of causal effects by reducing imbalance in covariates between participants with and without CKD).<sup>9</sup>

To explore the differences between the Berlin Initiative Study (BIS) equation and others and to reduce potential eGFR misclassification, we alternatively used the Chronic Kidney Disease

Epidemiology Collaboration (CKD-EPI) and the BIS2 equation whenever possible (note that data on cystatin-C were only available in SNAC-K and only at baseline).<sup>5</sup>

Since missing at random assumptions may not be verified, we conducted a complete case analysis by excluding the participants without information on every study variable and probable dietary misreporters, and assuming that missing FFQ items represented zero consumption.

Finally, to estimate the average of different study-specific effect sizes, we ran the analysis independently in each cohort and pooled the results using fixed-effects meta-analysis with the inverse-variance estimation method.

**eTable 1.** Participant Observations With Missing Data for Each Variable, Time Point, and Cohort

|                                        | SNAC-K    |             |             | Seniors-ENRICA 1 |             |             |             | Seniors-ENRICA 2 |             |             |
|----------------------------------------|-----------|-------------|-------------|------------------|-------------|-------------|-------------|------------------|-------------|-------------|
|                                        | Baseline  | Follow-up 1 | Follow-up 2 | Baseline         | Follow-up 1 | Follow-up 2 | Follow-up 3 | Baseline         | Follow-up 1 | Follow-up 2 |
| Observations                           | 2463      | 494         | 1503        | 3291             | 2073        | 869         | 869         | 2789             | 917         | 917         |
| Dietary variables                      |           |             |             |                  |             |             |             |                  |             |             |
| Electronic dietary history             | NA        | NA          | NA          | 13 (0.40)        | 4 (0.19)    | NA          | 0 (0)       | 5 (0.18)         | NA          | 0 (0)       |
| Semi-quantitative FFQ                  | 28 (1.14) | 13 (2.63)   | 18 (1.20)   | NA               | NA          | NA          | NA          | NA               | NA          | NA          |
| Chronic kidney disease                 |           |             |             |                  |             |             |             |                  |             |             |
| Estimated glomerular filtration rate   | 56 (2.27) | 12 (2.43)   | 24 (1.60)   | 20 (0.61)        | NA          | 36 (4.14)   | NA          | 233 (8.35)       | 93 (10.1)   | 100 (10.9)  |
| Urine albumin                          | NA        | NA          | NA          | 42 (1.28)        | NA          | NA          | NA          | 1580 (56.7)      | NA          | NA          |
| Patient histories                      | 0 (0)     | 0 (0)       | 0 (0)       | NA               | NA          | NA          | NA          | NA               | NA          | NA          |
| Hospital records                       | 45 (1.83) | 2 (0.40)    | 18 (1.20)   | NA               | NA          | NA          | NA          | NA               | NA          | NA          |
| Primary care records                   | NA        | NA          | NA          | NA               | NA          | NA          | NA          | 0 (0)            | 0 (0)       | 0 (0)       |
| Death certificates                     | 0 (0)     | 0 (0)       | 0 (0)       | 0 (0)            | NA          | 0 (0)       | NA          | NA               | NA          | NA          |
| Potential confounders                  |           |             |             |                  |             |             |             |                  |             |             |
| Sex                                    | 0 (0)     | NA          | NA          | 0 (0)            | NA          | NA          | NA          | 0 (0)            | NA          | NA          |
| Age                                    | 0 (0)     | 0 (0)       | 0 (0)       | 0 (0)            | 0 (0)       | NA          | 0 (0)       | 0 (0)            | NA          | 0 (0)       |
| Living arrangement                     | 6 (0.24)  | 4 (0.81)    | 8 (0.53)    | 0 (0)            | 0 (0)       | NA          | 0 (0)       | 1 (0.036)        | NA          | 15 (1.64)   |
| Previous occupation                    | 7 (0.28)  | NA          | NA          | 287 (8.72)       | NA          | NA          | NA          | 10 (0.36)        | NA          | NA          |
| Educational level                      | 3 (0.12)  | NA          | NA          | 6 (0.18)         | NA          | NA          | NA          | 2 (0.072)        | NA          | NA          |
| Tobacco smoking                        | 40 (1.62) | 0 (0)       | 7 (0.47)    | 7 (0.21)         | 0 (0)       | NA          | 0 (0)       | 0 (0)            | NA          | 0 (0)       |
| Light physical activity                | 43 (1.75) | 84 (17.0)   | 68 (4.52)   | 0 (0)            | 0 (0)       | NA          | 0 (0)       | 0 (0)            | NA          | 0 (0)       |
| Moderate-to-vigorous physical activity | 57 (2.31) | 82 (16.6)   | 70 (4.66)   | 0 (0)            | 0 (0)       | NA          | 0 (0)       | 0 (0)            | NA          | 0 (0)       |
| Body mass index                        | 30 (1.22) | 20 (4.05)   | 19 (1.26)   | 39 (1.19)        | 0 (0)       | NA          | 0 (0)       | 11 (0.39)        | NA          | 14 (1.53)   |
| Morbidities                            | 0 (0)     | 0 (0)       | 0 (0)       | 0 (0)            | 0 (0)       | NA          | 0 (0)       | 0 (0)            | NA          | 0 (0)       |

Values are observations (%). NA: not applicable.

Note that data on chronic kidney disease from Seniors-ENRICA 1's follow-up 2 were only used if study participants underwent dietary assessment at follow-up 3, while data on chronic kidney disease from Seniors-ENRICA 2's follow-up 1 were only used if study participants underwent dietary assessment at follow-up 2.

**eTable 2.** Characteristics of the Participant Observations, Stratified by Chronic Kidney Disease and Age

|                                            | Chronic kidney disease |             | No chronic kidney disease |             |
|--------------------------------------------|------------------------|-------------|---------------------------|-------------|
|                                            | <75 years              | ≥75 years   | <75 years                 | ≥75 years   |
| Observations                               | 1622                   | 3167        | 7734                      | 1876        |
| Sociodemographic variables                 |                        |             |                           |             |
| Sex – female                               | 790 (48.7)             | 1936 (61.1) | 4175 (54.0)               | 1083 (57.7) |
| Age, mean (standard deviation)             | 69.9 (3.68)            | 82.1 (4.58) | 67.9 (4.11)               | 78.7 (2.84) |
| Living arrangement – alone                 | 1253 (77.3)            | 1666 (52.6) | 5913 (76.5)               | 1219 (65.0) |
| Previous occupation – manual worker        | 698 (43.0)             | 1215 (38.4) | 3040 (39.3)               | 894 (47.6)  |
| Educational level                          |                        |             |                           |             |
| Primary or less                            | 696 (42.9)             | 1302 (41.1) | 3197 (41.3)               | 1071 (57.1) |
| Secondary                                  | 486 (30.0)             | 1163 (36.7) | 2299 (29.7)               | 438 (23.3)  |
| University                                 | 440 (27.1)             | 703 (22.2)  | 2238 (28.9)               | 367 (19.6)  |
| Lifestyle variables                        |                        |             |                           |             |
| Tobacco smoking                            |                        |             |                           |             |
| Never                                      | 761 (46.9)             | 1813 (57.2) | 3743 (48.4)               | 1117 (59.5) |
| Former                                     | 644 (39.7)             | 1166 (36.8) | 3032 (39.2)               | 627 (33.4)  |
| Current                                    | 218 (13.4)             | 188 (5.93)  | 959 (12.4)                | 132 (7.01)  |
| Light physical activity                    |                        |             |                           |             |
| Never                                      | 117 (7.24)             | 333 (10.5)  | 277 (3.58)                | 109 (5.79)  |
| Less than monthly                          | 111 (6.85)             | 308 (9.71)  | 352 (4.54)                | 120 (6.38)  |
| Monthly                                    | 383 (23.6)             | 555 (17.5)  | 1483 (19.2)               | 404 (21.5)  |
| Weekly                                     | 656 (40.5)             | 1133 (35.8) | 3652 (47.2)               | 838 (44.7)  |
| Daily                                      | 354 (21.8)             | 839 (26.5)  | 1971 (25.5)               | 406 (21.6)  |
| Moderate-to-vigorous physical activity     |                        |             |                           |             |
| Never                                      | 676 (41.7)             | 1856 (58.6) | 2461 (31.8)               | 842 (44.9)  |
| Less than monthly                          | 283 (17.5)             | 512 (16.2)  | 1303 (16.8)               | 342 (18.2)  |
| Monthly                                    | 316 (19.5)             | 357 (11.3)  | 1736 (22.4)               | 351 (18.7)  |
| Weekly                                     | 273 (16.9)             | 326 (10.3)  | 1826 (23.6)               | 251 (13.4)  |
| Daily                                      | 73 (4.53)              | 117 (3.69)  | 409 (5.28)                | 91 (4.85)   |
| Body mass index, mean (standard deviation) | 28.5 (4.80)            | 26.9 (4.34) | 27.5 (4.23)               | 27.3 (4.28) |
| Morbidity variables                        |                        |             |                           |             |
| Chronic kidney disease                     |                        |             |                           |             |
| Stage 1                                    | 36 (2.22)              | 13 (0.41)   | NA                        | NA          |
| Stage 2                                    | 489 (30.1)             | 237 (7.48)  | NA                        | NA          |
| Stage 3A                                   | 1030 (63.5)            | 2293 (72.4) | NA                        | NA          |
| Stage 3B                                   | 67 (4.13)              | 624 (19.7)  | NA                        | NA          |
| Diabetes                                   | 385 (23.7)             | 612 (19.3)  | 1161 (15.0)               | 378 (20.1)  |
| Cardiovascular disease                     | 241 (14.9)             | 916 (28.9)  | 682 (8.82)                | 338 (18.0)  |
| Chronic lung disease                       | 178 (11.0)             | 428 (13.5)  | 862 (11.1)                | 297 (15.8)  |
| Musculoskeletal disease                    | 713 (44.0)             | 1563 (49.4) | 3502 (45.3)               | 1219 (65.0) |
| Cancer                                     | 169 (10.4)             | 478 (15.1)  | 595 (7.69)                | 233 (12.4)  |
| Depression and mood disorders              | 195 (12.0)             | 325 (10.3)  | 798 (10.3)                | 239 (12.7)  |



Dietary variables, mean (standard deviation)

|                                |             |             |             |             |
|--------------------------------|-------------|-------------|-------------|-------------|
| Energy (g/kg/day)              | 27.1 (7.62) | 28.4 (8.75) | 27.3 (7.35) | 27.8 (6.90) |
| Total protein (g/kg/day)       | 1.18 (0.39) | 1.13 (0.36) | 1.17 (0.35) | 1.20 (0.32) |
| Animal protein (g/kg/day)      | 0.80 (0.32) | 0.77 (0.27) | 0.79 (0.27) | 0.79 (0.24) |
| Plant protein (g/kg/day)       | 0.38 (0.14) | 0.36 (0.13) | 0.39 (0.14) | 0.41 (0.13) |
| Monounsaturated fat (g/kg/day) | 0.47 (0.18) | 0.47 (0.17) | 0.47 (0.17) | 0.48 (0.16) |
| Sugar (g/kg/day)               | 1.21 (0.48) | 1.35 (0.56) | 1.24 (0.48) | 1.32 (0.49) |
| Alcohol (g/kg/day)             | 0.13 (0.19) | 0.11 (0.14) | 0.14 (0.18) | 0.11 (0.15) |
| Sodium (mg/kg/day)             | 36.7 (13.9) | 38.0 (14.8) | 36.5 (13.4) | 37.4 (12.3) |

---

Values are observations (%) unless otherwise indicated. NA: not applicable.

**eTable 3. Characteristics of the Participant Observations, Stratified by Chronic Kidney Disease and Cohort**

|                                     | Chronic kidney disease |                  |                  | No chronic kidney disease |                  |                  |
|-------------------------------------|------------------------|------------------|------------------|---------------------------|------------------|------------------|
|                                     | SNAC-K                 | Seniors-ENRICA 1 | Seniors-ENRICA 2 | SNAC-K                    | Seniors-ENRICA 1 | Seniors-ENRICA 2 |
| Observations                        | 1973                   | 1885             | 931              | 2487                      | 4348             | 2775             |
| Sociodemographic variables          |                        |                  |                  |                           |                  |                  |
| Sex – female                        | 1368 (69.3)            | 924 (49.0)       | 434 (46.6)       | 1395 (56.1)               | 2374 (54.6)      | 1489 (53.7)      |
| Age, mean (standard deviation)      | 81.1 (6.89)            | 75.5 (7.28)      | 76.6 (4.92)      | 68.0 (6.42)               | 69.6 (5.67)      | 72.4 (4.41)      |
| Living arrangement – alone          | 787 (39.9)             | 1464 (77.7)      | 669 (71.8)       | 1392 (56.0)               | 3594 (82.7)      | 2146 (77.3)      |
| Previous occupation – manual worker | 469 (23.8)             | 992 (52.6)       | 452 (48.5)       | 378 (15.2)                | 2185 (50.3)      | 1371 (49.4)      |
| Educational level                   |                        |                  |                  |                           |                  |                  |
| Primary or less                     | 339 (17.2)             | 1100 (58.3)      | 560 (60.2)       | 212 (8.52)                | 2316 (53.3)      | 1741 (62.7)      |
| Secondary                           | 1076 (54.5)            | 413 (21.9)       | 160 (17.2)       | 1109 (44.6)               | 1105 (25.4)      | 523 (18.9)       |
| University                          | 559 (28.3)             | 373 (19.8)       | 211 (22.7)       | 1166 (46.9)               | 928 (21.3)       | 511 (18.4)       |
| Lifestyle variables                 |                        |                  |                  |                           |                  |                  |
| Tobacco smoking                     |                        |                  |                  |                           |                  |                  |
| Never                               | 1081 (54.8)            | 1031 (54.7)      | 462 (49.6)       | 973 (39.1)                | 2456 (56.5)      | 1432 (51.6)      |
| Former                              | 733 (37.2)             | 675 (35.8)       | 402 (43.2)       | 1132 (45.5)               | 1445 (33.2)      | 1082 (39.0)      |
| Current                             | 159 (8.07)             | 179 (9.51)       | 67 (7.20)        | 382 (15.4)                | 447 (10.3)       | 261 (9.41)       |
| Light physical activity             |                        |                  |                  |                           |                  |                  |
| Never                               | 198 (10.0)             | 229 (12.1)       | 24 (2.58)        | 114 (4.60)                | 247 (5.68)       | 24 (0.86)        |
| Less than monthly                   | 196 (9.92)             | 175 (9.28)       | 48 (5.16)        | 115 (4.63)                | 292 (6.72)       | 64 (2.31)        |
| Monthly                             | 155 (7.85)             | 495 (26.3)       | 288 (30.9)       | 241 (9.68)                | 1047 (24.1)      | 599 (21.6)       |
| Weekly                              | 679 (34.4)             | 659 (35.0)       | 451 (48.4)       | 1033 (41.5)               | 1651 (38.0)      | 1806 (65.1)      |
| Daily                               | 746 (37.8)             | 327 (17.3)       | 120 (12.9)       | 984 (39.5)                | 1111 (25.6)      | 282 (10.2)       |

|                                              |             |             |             |             |             |             |
|----------------------------------------------|-------------|-------------|-------------|-------------|-------------|-------------|
| Moderate-to-vigorous physical activity       |             |             |             |             |             |             |
| Never                                        | 1059 (53.7) | 1165 (61.8) | 308 (33.1)  | 687 (27.6)  | 2168 (49.9) | 448 (16.1)  |
| Less than monthly                            | 370 (18.8)  | 255 (13.5)  | 170 (18.3)  | 531 (21.3)  | 730 (16.8)  | 384 (13.8)  |
| Monthly                                      | 187 (9.47)  | 263 (14.0)  | 223 (24.0)  | 449 (18.1)  | 814 (18.7)  | 823 (29.7)  |
| Weekly                                       | 263 (13.3)  | 165 (8.75)  | 171 (18.4)  | 649 (26.1)  | 528 (12.1)  | 900 (32.4)  |
| Daily                                        | 94 (4.78)   | 37 (1.96)   | 59 (6.34)   | 172 (6.90)  | 108 (2.48)  | 220 (7.93)  |
| Body mass index, mean (standard deviation)   | 25.8 (4.00) | 28.8 (4.58) | 28.2 (4.62) | 25.9 (3.71) | 28.3 (4.21) | 27.6 (4.35) |
| Morbidity variables                          |             |             |             |             |             |             |
| Chronic kidney disease                       |             |             |             |             |             |             |
| Stage 1                                      | 3 (0.15)    | 26 (1.38)   | 26 (2.15)   | NA          | NA          | NA          |
| Stage 2                                      | 6 (0.30)    | 524 (27.8)  | 524 (21.1)  | NA          | NA          | NA          |
| Stage 3A                                     | 1520 (77.0) | 1178 (62.5) | 1178 (67.1) | NA          | NA          | NA          |
| Stage 3B                                     | 444 (22.5)  | 157 (8.33)  | 157 (9.67)  | NA          | NA          | NA          |
| Diabetes                                     | 243 (12.3)  | 483 (25.6)  | 271 (29.1)  | 207 (8.32)  | 775 (17.8)  | 557 (20.1)  |
| Cardiovascular disease                       | 671 (34.0)  | 235 (12.5)  | 251 (27.0)  | 331 (13.3)  | 292 (6.72)  | 397 (14.3)  |
| Chronic lung disease                         | 244 (12.4)  | 197 (10.5)  | 165 (17.7)  | 276 (11.1)  | 473 (10.9)  | 410 (14.8)  |
| Musculoskeletal disease                      | 600 (30.4)  | 1083 (57.5) | 593 (63.7)  | 588 (23.6)  | 2457 (56.5) | 1676 (60.4) |
| Cancer                                       | 323 (16.4)  | 94 (4.99)   | 230 (24.7)  | 248 (9.97)  | 162 (3.73)  | 418 (15.1)  |
| Depression and mood disorders                | 189 (9.58)  | 226 (12.0)  | 105 (11.3)  | 217 (8.73)  | 494 (11.4)  | 326 (11.7)  |
| Dietary variables, mean (standard deviation) |             |             |             |             |             |             |
| Energy (g/kg/day)                            | 29.3 (10.4) | 27.1 (7.19) | 26.9 (4.90) | 26.5 (9.18) | 27.8 (7.08) | 27.7 (5.26) |
| Total protein (g/kg/day)                     | 1.01 (0.38) | 1.24 (0.38) | 1.22 (0.23) | 0.93 (0.34) | 1.26 (0.32) | 1.27 (0.26) |
| Animal protein (g/kg/day)                    | 0.71 (0.28) | 0.83 (0.32) | 0.80 (0.19) | 0.65 (0.26) | 0.84 (0.26) | 0.84 (0.22) |
| Plant protein (g/kg/day)                     | 0.30 (0.12) | 0.41 (0.13) | 0.42 (0.10) | 0.28 (0.11) | 0.43 (0.14) | 0.43 (0.11) |
| Monounsaturated fat (g/kg/day)               | 0.45 (0.19) | 0.47 (0.17) | 0.49 (0.13) | 0.42 (0.17) | 0.49 (0.17) | 0.51 (0.15) |
| Sugar (g/kg/day)                             | 1.41 (0.63) | 1.25 (0.47) | 1.20 (0.40) | 1.23 (0.58) | 1.28 (0.47) | 1.25 (0.42) |
| Alcohol (g/kg/day)                           | 0.11 (0.11) | 0.12 (0.20) | 0.11 (0.15) | 0.14 (0.12) | 0.13 (0.20) | 0.12 (0.17) |
| Sodium (mg/kg/day)                           | 38.8 (16.3) | 37.1 (14.4) | 35.9 (9.74) | 34.8 (14.2) | 37.6 (14.1) | 36.8 (10.5) |

Values are observations (%) unless otherwise indicated. NA: not applicable.

**eTable 4.** Hazard Ratios (95% CIs) of the Associations of the Main Sources of Animal and Plant Protein Intake With 10-Year All-Cause Mortality, Stratified by Chronic Kidney Disease

|                       | <b>Chronic kidney disease</b> | <b>No chronic kidney disease</b> |
|-----------------------|-------------------------------|----------------------------------|
| Deaths/observations   | 838/4789                      | 630/9610                         |
| <b>Dairy protein</b>  |                               |                                  |
| 0.10 g/kg/day         | Reference                     | Reference                        |
| 0.20 g/kg/day         | 0.82 (0.72-0.95)              | 1.01 (0.87-1.17)                 |
| 0.30 g/kg/day         | 0.74 (0.60-0.91)              | 1.01 (0.82-1.25)                 |
| 0.40 g/kg/day         | 0.71 (0.57-0.89)              | 1.01 (0.81-1.27)                 |
| 0.50 g/kg/day         | 0.69 (0.54-0.89)              | 1.01 (0.78-1.31)                 |
| Per 0.10 g/kg/day     | 0.95 (0.89-1.00)              | 1.01 (0.95-1.08)                 |
| <b>Meat protein</b>   |                               |                                  |
| 0.10 g/kg/day         | Reference                     | Reference                        |
| 0.20 g/kg/day         | 0.87 (0.77-0.97)              | 0.83 (0.73-0.95)                 |
| 0.30 g/kg/day         | 0.78 (0.64-0.95)              | 0.72 (0.57-0.90)                 |
| 0.40 g/kg/day         | 0.76 (0.61-0.94)              | 0.66 (0.51-0.85)                 |
| 0.50 g/kg/day         | 0.76 (0.60-0.96)              | 0.63 (0.48-0.82)                 |
| Per 0.10 g/kg/day     | 0.96 (0.91-1.02)              | 0.91 (0.86-0.97)                 |
| <b>Fish protein</b>   |                               |                                  |
| 0.10 g/kg/day         | Reference                     | Reference                        |
| 0.15 g/kg/day         | 0.91 (0.85-0.98)              | 0.91 (0.84-1.00)                 |
| 0.20 g/kg/day         | 0.85 (0.77-0.95)              | 0.85 (0.75-0.97)                 |
| 0.25 g/kg/day         | 0.82 (0.72-0.92)              | 0.81 (0.70-0.94)                 |
| 0.30 g/kg/day         | 0.79 (0.69-0.91)              | 0.78 (0.66-0.93)                 |
| Per 0.10 g/kg/day     | 0.90 (0.84-0.97)              | 0.89 (0.81-0.97)                 |
| <b>Cereal protein</b> |                               |                                  |
| 0.10 g/kg/day         | Reference                     | Reference                        |
| 0.15 g/kg/day         | 0.90 (0.79-1.01)              | 0.80 (0.71-0.90)                 |
| 0.20 g/kg/day         | 0.80 (0.65-0.99)              | 0.66 (0.54-0.82)                 |
| 0.25 g/kg/day         | 0.72 (0.56-0.94)              | 0.59 (0.45-0.77)                 |
| 0.30 g/kg/day         | 0.65 (0.48-0.89)              | 0.55 (0.41-0.74)                 |
| Per 0.10 g/kg/day     | 0.84 (0.72-0.97)              | 0.80 (0.68-0.93)                 |

Cox proportional hazards regression models. Protein intake was modelled as a continuous variable (per 0.10 g/kg/day) or a 3-knot restricted cubic spline otherwise. Hazard ratios (95% confidence intervals) of the associations of dairy, meat, and fish protein intake were obtained from models integrating interaction terms between the relevant source of animal protein and chronic kidney

disease, between other animal proteins and chronic kidney disease, and between plant protein and chronic kidney disease. Hazard ratios (95% confidence intervals) of the associations of cereal protein intake were obtained from models integrating interaction terms between cereal protein and chronic kidney disease, between other plant proteins and chronic kidney disease, and between animal protein and chronic kidney disease.

Models were adjusted for cohort (SNAC-K, Seniors-ENRICA 1, or Seniors-ENRICA 2), sex (male or female), age (years), living arrangement (alone or with spouse/partner/other), previous occupation (manual worker or non-manual worker), educational level (primary or less, secondary, or university), tobacco smoking (never, former, or current), light physical activity (daily, weekly, monthly, less often, or never), moderate-to-vigorous physical activity (daily, weekly, monthly, less often, or never), body mass index ( $\text{kg}/\text{m}^2$ ), diabetes, cardiovascular disease (ischemic heart disease, cerebrovascular disease, or heart failure), chronic lung disease (chronic obstructive pulmonary disease/emphysema/chronic bronchitis or asthma), musculoskeletal disease (osteoarthritis and other degenerative joint diseases, inflammatory arthropathies, or current pathological fracture), cancer (hematological and solid neoplasms), depression and mood disorders (e.g., manic episode, bipolar affective disorder), energy intake ( $\text{g}/\text{kg}/\text{day}$ ), monounsaturated fat ( $\text{g}/\text{kg}/\text{day}$ ), sugar ( $\text{g}/\text{kg}/\text{day}$ ), alcohol ( $\text{g}/\text{kg}/\text{day}$ ), and sodium intake ( $\text{mg}/\text{kg}/\text{day}$ ).

**eTable 5.** Hazard Ratios (95% CIs) of the Associations of Changes in Total, Animal, and Plant Protein Intake With 10-Year All-Cause Mortality, Stratified by Chronic Kidney Disease

|                       | <b>Chronic kidney disease</b> | <b>No chronic kidney disease</b> |
|-----------------------|-------------------------------|----------------------------------|
| Deaths/observations   | 302/1368                      | 194/3323                         |
| <b>Total protein</b>  |                               |                                  |
| -0.20 g/kg/day        | Reference                     | Reference                        |
| -0.10 g/kg/day        | 0.96 (0.89-1.03)              | 0.92 (0.85-0.99)                 |
| 0.00 g/kg/day         | 0.91 (0.80-1.05)              | 0.86 (0.74-0.99)                 |
| +0.10 g/kg/day        | 0.87 (0.71-1.07)              | 0.81 (0.66-1.00)                 |
| +0.20 g/kg/day        | 0.83 (0.63-1.09)              | 0.78 (0.60-1.03)                 |
| Per +0.10 g/kg/day    | 0.96 (0.90-1.03)              | 0.95 (0.89-1.02)                 |
| <b>Animal protein</b> |                               |                                  |
| -0.20 g/kg/day        | Reference                     | Reference                        |
| -0.10 g/kg/day        | 0.95 (0.88-1.03)              | 0.90 (0.83-0.98)                 |
| 0.00 g/kg/day         | 0.89 (0.77-1.03)              | 0.83 (0.71-0.97)                 |
| +0.10 g/kg/day        | 0.82 (0.66-1.02)              | 0.78 (0.63-0.98)                 |
| +0.20 g/kg/day        | 0.75 (0.56-1.00)              | 0.76 (0.57-1.00)                 |
| Per +0.10 g/kg/day    | 0.96 (0.90-1.03)              | 0.95 (0.89-1.02)                 |
| <b>Plant protein</b>  |                               |                                  |
| -0.10 g/kg/day        | Reference                     | Reference                        |
| -0.05 g/kg/day        | 0.84 (0.76-0.94)              | 0.83 (0.74-0.94)                 |
| 0.00 g/kg/day         | 0.72 (0.60-0.88)              | 0.70 (0.56-0.87)                 |
| +0.05 g/kg/day        | 0.64 (0.48-0.84)              | 0.60 (0.44-0.81)                 |
| +0.10 g/kg/day        | 0.57 (0.39-0.83)              | 0.52 (0.35-0.76)                 |
| Per +0.10 g/kg/day    | 0.81 (0.68-0.97)              | 0.79 (0.66-0.94)                 |

\* Two-tailed p value<0.05.

Cox proportional hazards regression models. Changes in protein intake were modelled as a continuous variable (per +0.10 g/kg/day) or a 3-knot restricted cubic spline otherwise. Hazard ratios (95% confidence intervals) were obtained from models with interaction terms between changes in protein intake and baseline chronic kidney disease. Models on protein sources integrated multiplicative interactions between changes in animal protein and baseline CKD and between changes in plant protein intake and baseline CKD.

Models were adjusted for cohort (SNAC-K, Seniors-ENRICA 1, or Seniors-ENRICA 2), sex (male or female), baseline age (years), living arrangement (remained living alone, started living alone, stopped living alone, or remained with spouse/partner/other), previous occupation (manual worker or non-manual worker), educational level (primary or less, secondary, or university), tobacco smoking (remained a non-smoker, started smoking, stopped smoking, or remained a smoker), baseline light physical activity (daily, weekly, monthly, less often, or never), changes in light physical activity (nine categories, from daily-to-never to never-to-daily), baseline moderate-to-vigorous physical activity (daily, weekly, monthly, less often, or never), changes in moderate-to-vigorous physical activity (nine categories, from daily-to-never to never-to-daily), baseline body mass index ( $\text{kg}/\text{m}^2$ ), changes in body mass index ( $\text{kg}/\text{m}^2$ ), diabetes (remained free from the disease, disease incidence, or remained with the disease), cardiovascular disease (remained free from the disease, disease incidence, or remained with the disease), chronic lung disease (remained free from the disease, disease incidence, or remained with the disease), musculoskeletal disease (remained free from the disease, disease incidence, disease remission, or remained with the disease), cancer (remained free from the disease, disease incidence, or remained with the disease), depression and mood disorders (remained free from the disease, disease incidence, disease remission, or remained with the disease), baseline energy ( $\text{g}/\text{kg}/\text{day}$ ), changes in energy intake ( $\text{g}/\text{kg}/\text{day}$ ), baseline monounsaturated fat ( $\text{g}/\text{kg}/\text{day}$ ), changes in monounsaturated fat intake ( $\text{g}/\text{kg}/\text{day}$ ), baseline sugar ( $\text{g}/\text{kg}/\text{day}$ ), changes in sugar intake ( $\text{g}/\text{kg}/\text{day}$ ), baseline alcohol ( $\text{g}/\text{kg}/\text{day}$ ), changes in alcohol intake ( $\text{g}/\text{kg}/\text{day}$ ), baseline sodium ( $\text{mg}/\text{kg}/\text{day}$ ), and changes in sodium intake ( $\text{mg}/\text{kg}/\text{day}$ ). Analyses of changes in total protein intake were adjusted for baseline total protein ( $\text{g}/\text{kg}/\text{day}$ ). Analyses of changes in animal protein intake were adjusted for baseline animal protein ( $\text{g}/\text{kg}/\text{day}$ ) and baseline plant protein ( $\text{g}/\text{kg}/\text{day}$ ). Analyses of changes in plant protein intake were adjusted for baseline plant protein ( $\text{g}/\text{kg}/\text{day}$ ) and baseline animal protein ( $\text{g}/\text{kg}/\text{day}$ ).

**eTable 6.** Sensitivity Analyses: Hazard Ratios (95% CIs) of the Associations of Total, Animal, and Plant Protein Intake With 10-Year All-Cause Mortality, Stratified by Chronic Kidney Disease

|                                                  | Chronic kidney disease | No chronic kidney disease |
|--------------------------------------------------|------------------------|---------------------------|
| <b>Excluding cognitive impairment</b>            |                        |                           |
| Deaths/observations                              | 797/4666               | 612/9484                  |
| Total protein                                    | 0.93 (0.86-0.99)       | 0.87 (0.80-0.94)          |
| Animal protein                                   | 0.89 (0.82-0.96)       | 0.91 (0.83-0.99)          |
| Plant protein                                    | 0.82 (0.66-1.01)       | 0.64 (0.51-0.79)          |
| <b>Cumulative average after incident CKD</b>     |                        |                           |
| Deaths/observations                              | 838/4789               | 630/9610                  |
| Total protein                                    | 0.91 (0.85-0.98)       | 0.85 (0.79-0.92)          |
| Animal protein                                   | 0.88 (0.81-0.95)       | 0.90 (0.82-0.98)          |
| Plant protein                                    | 0.79 (0.65-0.97)       | 0.61 (0.50-0.76)          |
| <b>Omitting the first year of follow-up</b>      |                        |                           |
| Deaths/observations                              | 808/4759               | 613/9593                  |
| Total protein                                    | 0.93 (0.86-0.99)       | 0.85 (0.79-0.92)          |
| Animal protein                                   | 0.89 (0.82-0.96)       | 0.89 (0.82-0.97)          |
| Plant protein                                    | 0.82 (0.67-1.01)       | 0.62 (0.50-0.78)          |
| <b>Protein as % of energy intake</b>             |                        |                           |
| Deaths/observations                              | 838/4789               | 630/9610                  |
| Total protein                                    | 0.94 (0.89-1.00)       | 0.92 (0.86-0.97)          |
| Animal protein                                   | 0.92 (0.86-0.97)       | 0.93 (0.88-0.99)          |
| Plant protein                                    | 0.87 (0.75-1.02)       | 0.70 (0.59-0.83)          |
| <b>Protein as g/kg of ideal body weight/day</b>  |                        |                           |
| Deaths/observations                              | 838/4789               | 630/9610                  |
| Total protein                                    | 0.93 (0.88-0.99)       | 0.88 (0.82-0.94)          |
| Animal protein                                   | 0.89 (0.83-0.95)       | 0.91 (0.84-0.98)          |
| Plant protein                                    | 0.84 (0.70-1.01)       | 0.66 (0.54-0.79)          |
| <b>Excluding large changes in protein intake</b> |                        |                           |
| Deaths/observations                              | 786/4224               | 596/8776                  |
| Total protein                                    | 0.93 (0.86-1.00)       | 0.86 (0.79-0.93)          |
| Animal protein                                   | 0.89 (0.82-0.97)       | 0.91 (0.83-0.99)          |
| Plant protein                                    | 0.83 (0.67-1.02)       | 0.62 (0.50-0.78)          |
| <b>Adjusting for the frailty phenotype</b>       |                        |                           |
| Deaths/observations                              | 838/4789               | 630/9610                  |
| Total protein                                    | 0.92 (0.86-0.99)       | 0.85 (0.79-0.92)          |
| Animal protein                                   | 0.89 (0.82-0.96)       | 0.89 (0.82-0.97)          |
| Plant protein                                    | 0.81 (0.66-1.00)       | 0.62 (0.50-0.77)          |
| <b>Adjusting for hypertension</b>                |                        |                           |
| Deaths/observations                              | 838/4789               | 630/9610                  |
| Total protein                                    | 0.92 (0.86-0.98)       | 0.85 (0.79-0.92)          |
| Animal protein                                   | 0.88 (0.81-0.95)       | 0.89 (0.82-0.98)          |
| Plant protein                                    | 0.80 (0.65-0.98)       | 0.61 (0.49-0.76)          |



|                                                 |                  |                  |
|-------------------------------------------------|------------------|------------------|
| <b>Baseline data only</b>                       |                  |                  |
| Deaths/observations                             | 816/2547         | 652/5996         |
| Total protein                                   | 0.97 (0.92-1.03) | 0.91 (0.85-0.97) |
| Animal protein                                  | 0.95 (0.89-1.01) | 0.95 (0.88-1.02) |
| Plant protein                                   | 0.95 (0.79-1.13) | 0.74 (0.62-0.89) |
| <b>Coarsened exact matching (baseline data)</b> |                  |                  |
| Deaths/observations                             | 594/2168         | 581/5380         |
| Total protein                                   | 0.98 (0.91-1.05) | 0.88 (0.81-0.97) |
| Animal protein                                  | 0.93 (0.86-1.01) | 0.90 (0.82-0.99) |
| Plant protein                                   | 0.85 (0.67-1.10) | 0.63 (0.51-0.79) |
| <b>BIS2 equation for eGFR</b>                   |                  |                  |
| Deaths/observations                             | 707/4158         | 761/10241        |
| Total protein                                   | 0.92 (0.85-0.99) | 0.87 (0.81-0.93) |
| Animal protein                                  | 0.87 (0.80-0.94) | 0.91 (0.84-0.98) |
| Plant protein                                   | 0.82 (0.66-1.02) | 0.61 (0.50-0.75) |
| <b>CKD-EPI equation for eGFR</b>                |                  |                  |
| Deaths/observations                             | 580/3016         | 888/11383        |
| Total protein                                   | 0.91 (0.84-0.98) | 0.88 (0.82-0.95) |
| Animal protein                                  | 0.87 (0.79-0.95) | 0.91 (0.84-0.97) |
| Plant protein                                   | 0.81 (0.64-1.02) | 0.67 (0.54-0.81) |
| <b>Excluding CKD medical diagnoses</b>          |                  |                  |
| Deaths/observations                             | 819/4680         | 630/9610         |
| Total protein                                   | 0.92 (0.86-0.99) | 0.85 (0.78-0.91) |
| Animal protein                                  | 0.88 (0.82-0.96) | 0.89 (0.81-0.97) |
| Plant protein                                   | 0.82 (0.66-1.01) | 0.62 (0.50-0.77) |
| <b>Complete case analysis</b>                   |                  |                  |
| Deaths/observations                             | 709/4313         | 576/9004         |
| Total protein                                   | 0.92 (0.85-0.99) | 0.85 (0.78-0.92) |
| Animal protein                                  | 0.88 (0.80-0.96) | 0.87 (0.79-0.95) |
| Plant protein                                   | 0.76 (0.60-0.96) | 0.62 (0.49-0.78) |
| <b>Fixed-effects meta-analysis</b>              |                  |                  |
| Deaths/observations                             | 838/4789         | 630/9610         |
| Total protein                                   | 0.91 (0.84-0.98) | 0.88 (0.82-0.95) |
| Animal protein                                  | 0.88 (0.81-0.95) | 0.90 (0.83-0.98) |
| Plant protein                                   | 0.76 (0.61-0.96) | 0.63 (0.50-0.80) |

Cox proportional hazards regression models. Protein intake was modelled as a continuous variable (per 0.2 g/kg/day, 2% of energy intake, or 0.2 g/kg of ideal body weight/day). Hazard ratios (95% confidence intervals) were obtained from models with interaction terms between protein intake and chronic kidney disease. Models on protein sources integrated multiplicative interactions between animal protein and CKD and between plant protein intake and CKD.

Models were adjusted for cohort (SNAC-K, Seniors-ENRICA 1, or Seniors-ENRICA 2), sex (male or female), age (years), living arrangement (alone or with spouse/partner/other), previous occupation (manual worker or non-manual worker), educational level (primary or less, secondary, or university), tobacco smoking (never, former, or current), light physical activity (daily, weekly, monthly, less often, or never), moderate-to-vigorous physical activity (daily, weekly, monthly, less often, or never), body mass index ( $\text{kg}/\text{m}^2$ ), diabetes, cardiovascular disease (ischemic heart disease, cerebrovascular disease, or heart failure), chronic lung disease (chronic obstructive pulmonary disease/emphysema/chronic bronchitis or asthma), musculoskeletal disease (osteoarthritis and other degenerative joint diseases, inflammatory arthropathies, or current pathological fracture), cancer (hematological and solid neoplasms), depression and mood disorders (e.g., manic episode, bipolar affective disorder), energy intake ( $\text{kcal}/\text{kg}/\text{day}$ ,  $\text{kcal}/\text{day}$ , or  $\text{kcal}/\text{ideal kg}/\text{day}$ ), monounsaturated fat ( $\text{g}/\text{kg}/\text{day}$ , % of energy intake, or  $\text{g}/\text{ideal kg}/\text{day}$ ), sugar ( $\text{g}/\text{kg}/\text{day}$ , % of energy intake, or  $\text{g}/\text{ideal kg}/\text{day}$ ), alcohol ( $\text{g}/\text{kg}/\text{day}$ , % of energy intake, or  $\text{g}/\text{ideal kg}/\text{day}$ ), and sodium intake ( $\text{mg}/\text{kg}/\text{day}$ ,  $\text{mg}/\text{day}$ , or  $\text{mg}/\text{ideal kg}/\text{day}$ ).

**eFigure 1.** Participants' Flowchart, Stratified by Cohort

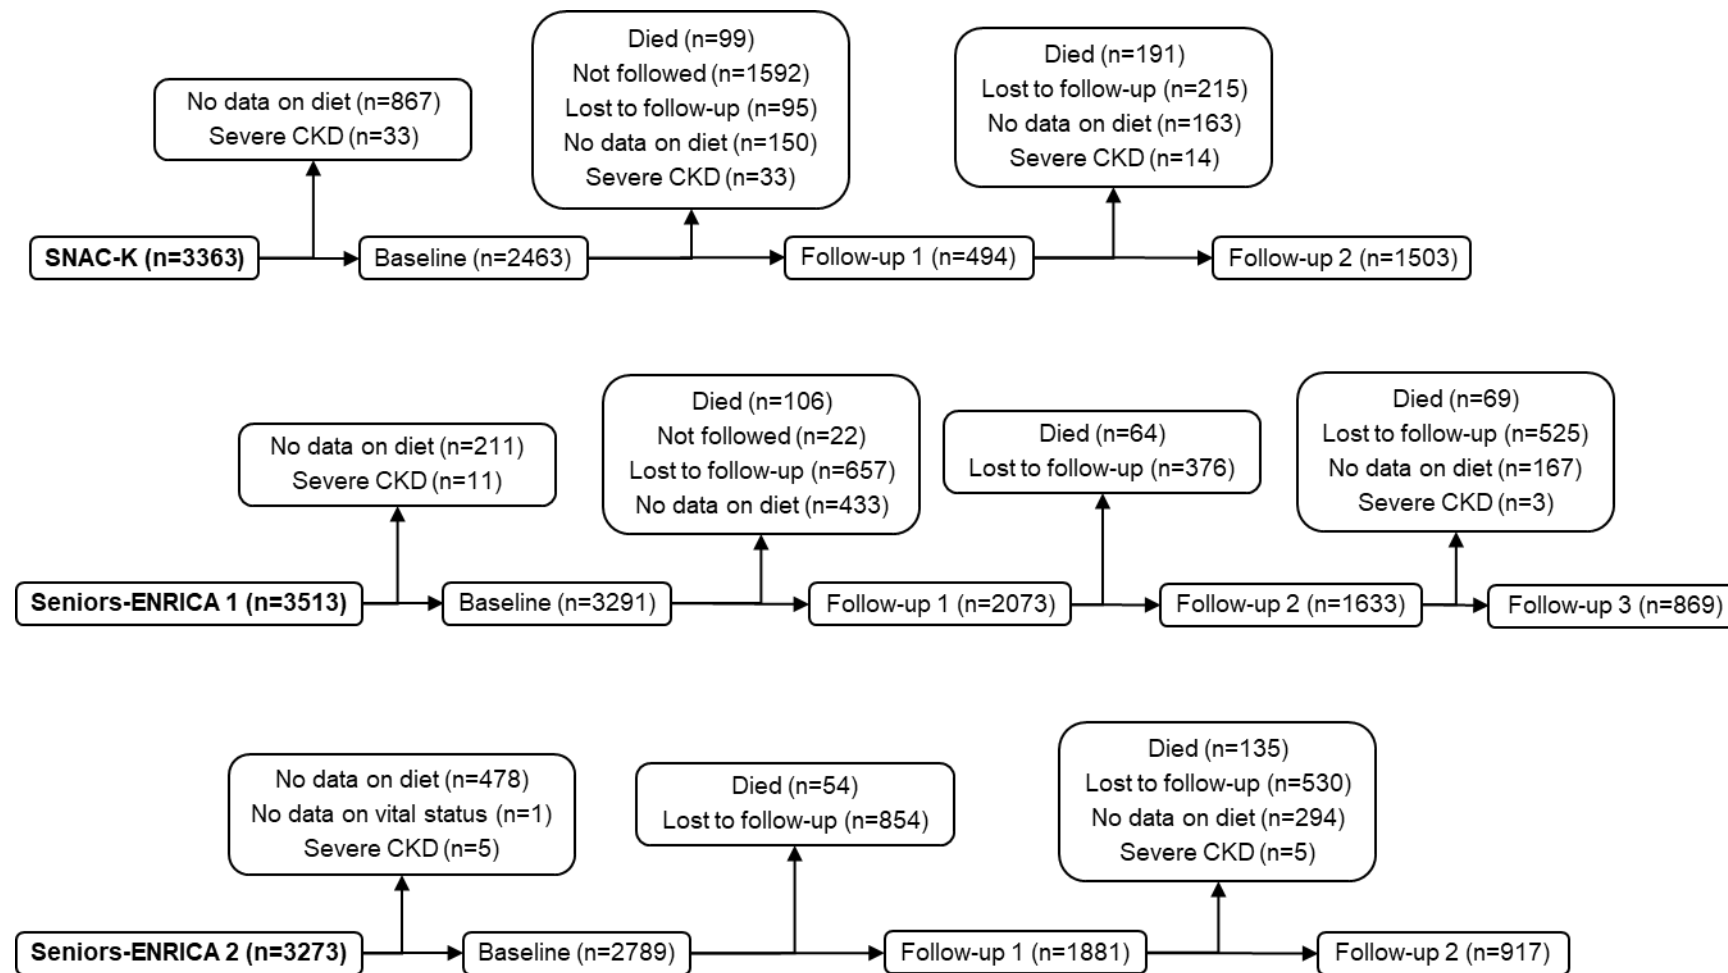

Note that data on chronic kidney disease from Seniors-ENRICA 1's follow-up 2 were only used if study participants underwent dietary assessment at follow-up 3, while data on chronic kidney disease from Seniors-ENRICA 2's follow-up 1 were only used if study participants underwent dietary assessment at follow-up 2.

**eFigure 2.** Association of Total Protein Intake With 10-Year All-Cause Mortality, Stratified by Chronic Kidney Disease and Cohort

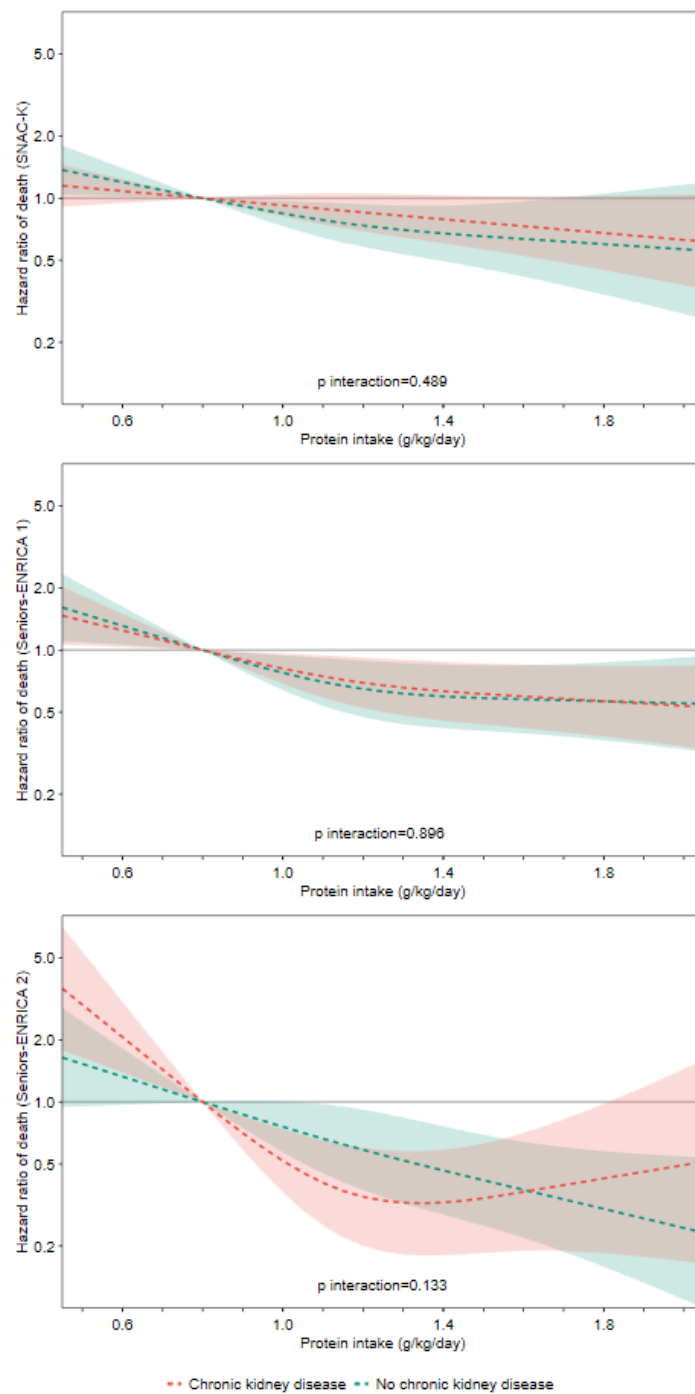

Cox proportional hazards regression models. Protein intake was modelled as a 3-knot restricted cubic spline. Hazard ratios (95% confidence intervals) were plotted for protein intakes above the 1<sup>st</sup> percentile and below the 99<sup>th</sup> percentile and obtained from models with interaction terms between

protein intake, chronic kidney disease, and cohort (SNAC-K, Seniors-ENRICA 1, or Seniors-ENRICA 2).

Models were adjusted for sex (male or female), age (years), living arrangement (alone or with spouse/partner/other), previous occupation (manual worker or non-manual worker), educational level (primary or less, secondary, or university), tobacco smoking (never, former, or current), light physical activity (daily, weekly, monthly, less often, or never), moderate-to-vigorous physical activity (daily, weekly, monthly, less often, or never), body mass index ( $\text{kg}/\text{m}^2$ ), diabetes, cardiovascular disease (ischemic heart disease, cerebrovascular disease, or heart failure), chronic lung disease (chronic obstructive pulmonary disease/emphysema/chronic bronchitis or asthma), musculoskeletal disease (osteoarthritis and other degenerative joint diseases, inflammatory arthropathies, or current pathological fracture), cancer (hematological and solid neoplasms), depression and mood disorders (e.g., manic episode, bipolar affective disorder), energy intake ( $\text{g}/\text{kg}/\text{day}$ ), monounsaturated fat ( $\text{g}/\text{kg}/\text{day}$ ), sugar ( $\text{g}/\text{kg}/\text{day}$ ), alcohol ( $\text{g}/\text{kg}/\text{day}$ ), and sodium intake ( $\text{mg}/\text{kg}/\text{day}$ ).

**eFigure 3.** Association of Total Protein Intake With 10-Year All-Cause Mortality, Stratified by Chronic Kidney Disease and Sex

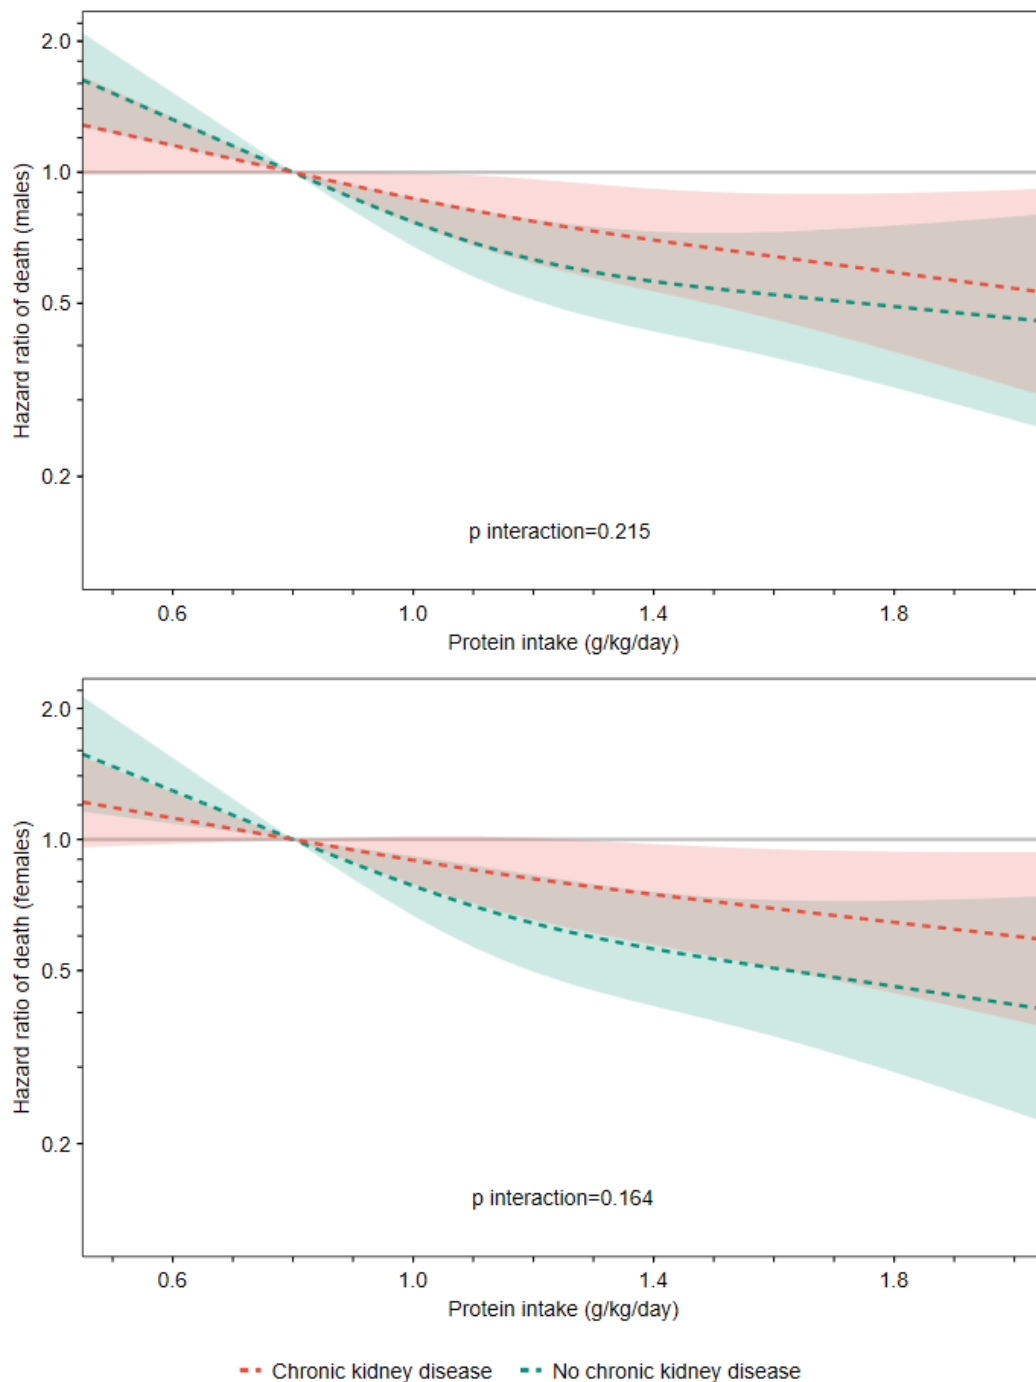

Cox proportional hazards regression models. Protein intake was modelled as a 3-knot restricted cubic spline. Hazard ratios (95% confidence intervals) were plotted for protein intakes above the 1<sup>st</sup> percentile and below the 99<sup>th</sup> percentile and obtained from models with interaction terms between protein intake, chronic kidney disease, and sex (male, female).

Models were adjusted for cohort (SNAC-K, Seniors-ENRICA 1, or Seniors-ENRICA 2), age (years), living arrangement (alone or with spouse/partner/other), previous occupation (manual worker or non-manual worker), educational level (primary or less, secondary, or university), tobacco smoking (never, former, or current), light physical activity (daily, weekly, monthly, less often, or never), moderate-to-vigorous physical activity (daily, weekly, monthly, less often, or never), body mass index ( $\text{kg}/\text{m}^2$ ), diabetes, cardiovascular disease (ischemic heart disease, cerebrovascular disease, or heart failure), chronic lung disease (chronic obstructive pulmonary disease/emphysema/chronic bronchitis or asthma), musculoskeletal disease (osteoarthritis and other degenerative joint diseases, inflammatory arthropathies, or current pathological fracture), cancer (hematological and solid neoplasms), depression and mood disorders (e.g., manic episode, bipolar affective disorder), energy intake ( $\text{g}/\text{kg}/\text{day}$ ), monounsaturated fat ( $\text{g}/\text{kg}/\text{day}$ ), sugar ( $\text{g}/\text{kg}/\text{day}$ ), alcohol ( $\text{g}/\text{kg}/\text{day}$ ), and sodium intake ( $\text{mg}/\text{kg}/\text{day}$ ).



**eFigure 4.** Association of the Proportion of Plant Protein With 10-Year All-Cause Mortality, Stratified by Chronic Kidney Disease and Age

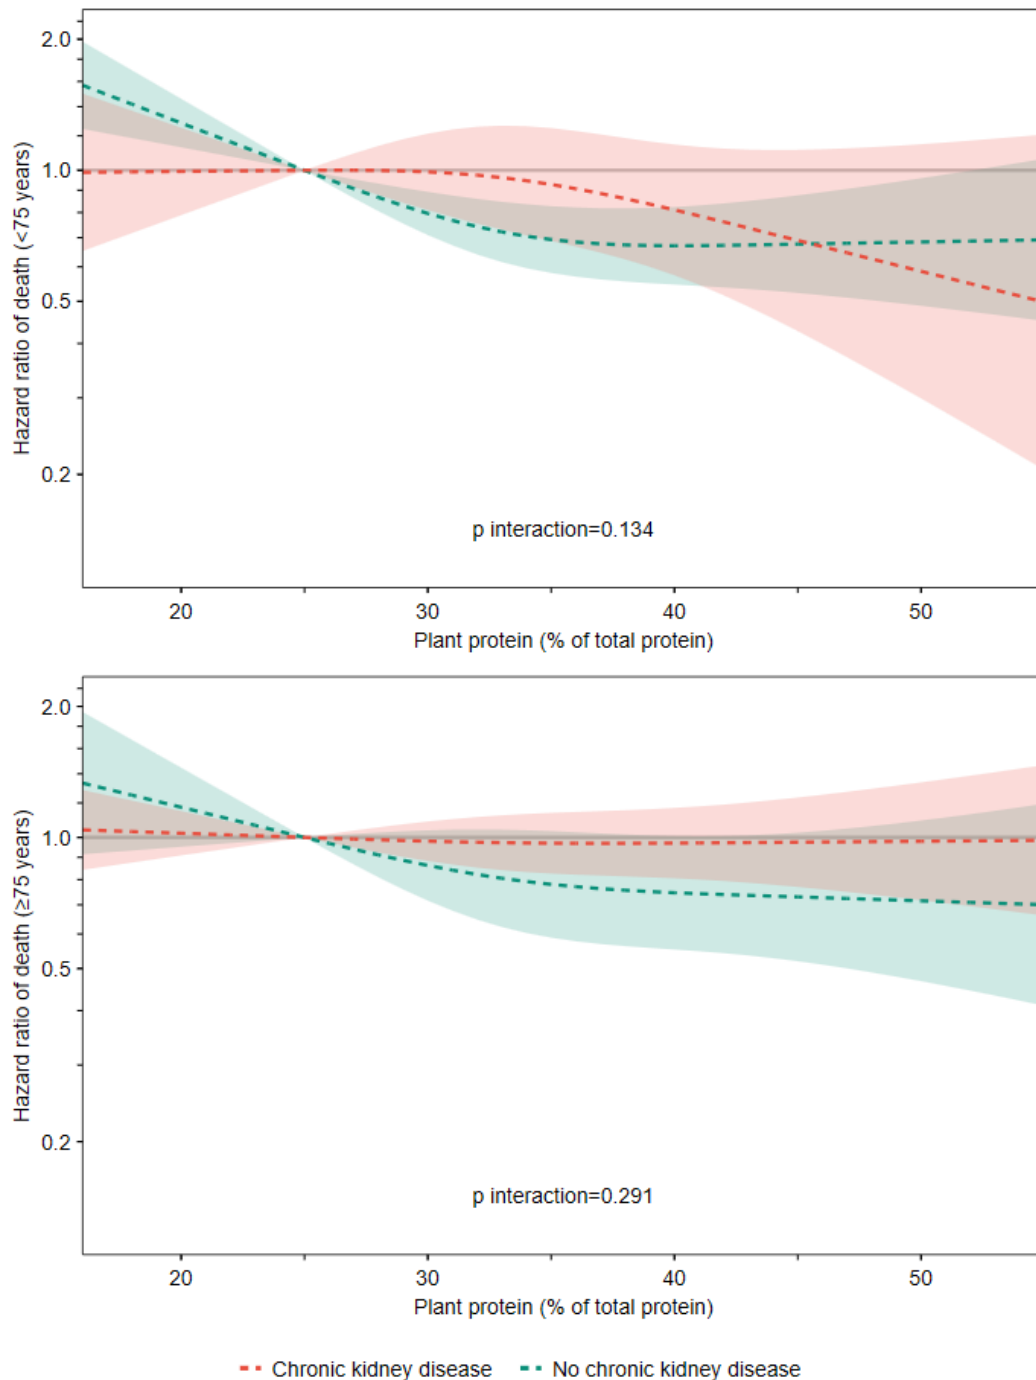

Cox proportional hazards regression models. The proportion of plant protein intake was modelled as a 3-knot restricted cubic spline. Hazard ratios (95% confidence intervals) were plotted for proportions of plant protein intake above the 1<sup>st</sup> percentile and below the 99<sup>th</sup> percentile and

obtained from models with interaction terms between the proportion of plant protein intake, chronic kidney disease, and age.

Models were adjusted for cohort (SNAC-K, Seniors-ENRICA 1, or Seniors-ENRICA 2), sex (male or female), age (years), living arrangement (alone or with spouse/partner/other), previous occupation (manual worker or non-manual worker), educational level (primary or less, secondary, or university), tobacco smoking (never, former, or current), light physical activity (daily, weekly, monthly, less often, or never), moderate-to-vigorous physical activity (daily, weekly, monthly, less often, or never), body mass index ( $\text{kg}/\text{m}^2$ ), diabetes, cardiovascular disease (ischemic heart disease, cerebrovascular disease, or heart failure), chronic lung disease (chronic obstructive pulmonary disease/emphysema/chronic bronchitis or asthma), musculoskeletal disease (osteoarthritis and other degenerative joint diseases, inflammatory arthropathies, or current pathological fracture), cancer (hematological and solid neoplasms), depression and mood disorders (e.g., manic episode, bipolar affective disorder), energy intake ( $\text{g}/\text{kg}/\text{day}$ ), monounsaturated fat ( $\text{g}/\text{kg}/\text{day}$ ), sugar ( $\text{g}/\text{kg}/\text{day}$ ), alcohol ( $\text{g}/\text{kg}/\text{day}$ ), sodium ( $\text{mg}/\text{kg}/\text{day}$ ), and total protein intake ( $\text{g}/\text{kg}/\text{day}$ ).

## eReferences.

1. Calderón-Larrañaga A, Vetrano DL, Onder G, et al. Assessing and Measuring Chronic Multimorbidity in the Older Population: A Proposal for Its Operationalization. *J Gerontol A Biol Sci Med Sci*. 2017;72(10):1417-1423. doi:10.1093/GERONA/GLW233
2. Rodríguez-Artalejo F, Graciani A, Guallar-Castillón P, et al. Rationale and Methods of the Study on Nutrition and Cardiovascular Risk in Spain (ENRICA). *Rev Esp Cardiol*. 2011;64(10):876-882. doi:10.1016/j.rec.2011.05.023
3. Ortolá R, García-Esquinas E, Sotos-Prieto M, et al. Mediterranean Diet and Changes in Frequency, Severity, and Localization of Pain in Older Adults: The Seniors-ENRICA Cohorts. *The Journals of Gerontology: Series A*. 2022;77(1):122-130. doi:10.1093/GERONA/GLAB109
4. Lagergren M, Fratiglioni L, Hallberg IR, et al. A longitudinal study integrating population, care and social services data. The Swedish National study on Aging and Care (SNAC). *Aging Clin Exp Res*. 2004;16(2):158-168. doi:10.1007/BF03324546/METRICS
5. Beridze G, Vetrano DL, Marengoni A, Dai L, Carrero JJ, Calderón-Larrañaga A. Concordance and Discrepancies Among 5 Creatinine-Based Equations for Assessing Estimated Glomerular Filtration Rate in Older Adults. *JAMA Netw Open*. 2023;6(3):e234211. doi:10.1001/jamanetworkopen.2023.4211
6. Michels KB, Willett WC. Self-administered semiquantitative food frequency questionnaires: patterns, predictors, and interpretation of omitted items. *Epidemiology*. 2009;20(2):295. doi:10.1097/EDE.0B013E3181931515
7. White IR, Royston P, Wood AM. Multiple imputation using chained equations: Issues and guidance for practice. *Stat Med*. 2011;30(4):377-399. doi:10.1002/sim.4067

8. Fried LP, Tangen CM, Walston J, et al. Frailty in older adults: evidence for a phenotype. *J Gerontol A Biol Sci Med Sci*. 2001;56(3). doi:10.1093/GERONA/56.3.M146
9. Blackwell M, Iacus S, King G, Porro G. Cem: Coarsened Exact Matching in Stata. <https://doi.org/10.1177/1536867X0900900402>. 2009;9(4):524-546.  
doi:10.1177/1536867X0900900402
