# Supplementary material for: Protein Intake and Mortality in Older Adults With Chronic Kidney Disease
Source: PubMed Central journal article supplement (PMC11307132; doi:10.1001/jamanetworkopen.2024.26577), 2024-08-07
Supplement: jamanetwopen-e2426577-s002.pdf [file jamanetwopen-e2426577-s002.pdf]

## Data Sharing Statement

Carballo-Casla. Protein Intake and Mortality in Older Adults With Chronic Kidney Disease. *JAMA Netw Open*. Published August 07, 2024. doi:10.1001/jamanetworkopen.2024.26577

### Data

**Data available:** Yes

**Data types:** Other (please specify)

**Additional Information:** Access to the Seniors-ENRICA and SNAC-K original data is available to the research community upon approval by the corresponding data management and maintenance committees.

**How to access data:** Applications for accessing Seniors-ENRICA data can be submitted to principal investigator Fernando Rodríguez-Artalejo ([fernando.artalejo@uam.es](mailto:fernando.artalejo@uam.es)). Applications for accessing SNAC-K data can be submitted to data manager Maria Wahlberg ([maria.wahlberg@ki.se](mailto:maria.wahlberg@ki.se)).

### Additional Information

**Who can access the data:** Anyone requesting the data.

**Types of analyses:** Case-by-case.

**Mechanisms of data availability:** Case-by-case.
